# Supplementary material for: The Human Skin Microbiome Associates with the Outcome of and Is Influenced by Bacterial Infection
Source: PubMed Central journal article supplement — mBio. 2015 Sep 15;6(5):e01315-15. doi: 10.1128/mBio.01315-15 (PMC4600114; doi:10.1128/mbio.01315-15), 2015-09-15
Supplement: mbo004152461sf1.pdf [file mbo004152461sf1.pdf]

Figure S1

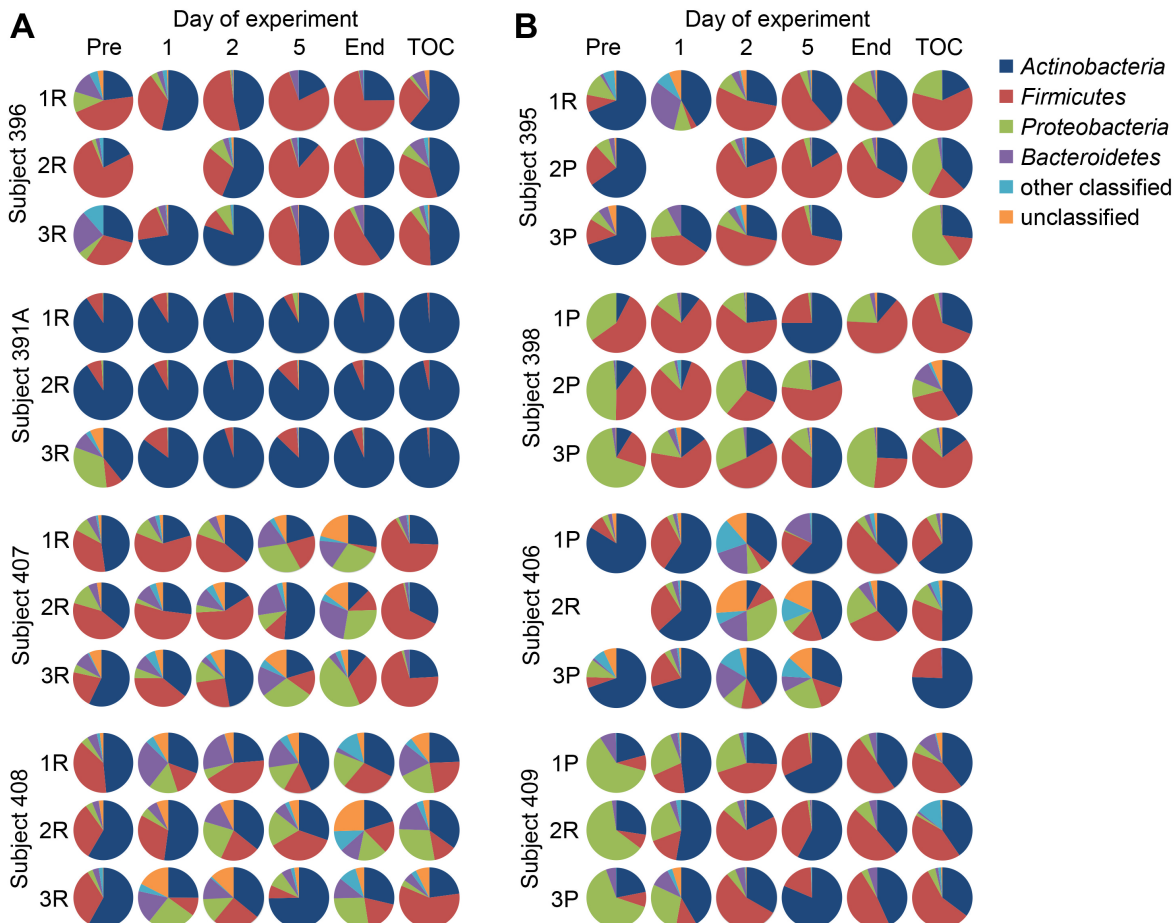

FIG S1 Distribution of the four dominant phyla in resolvers (A) and pustule formers (B). Shown here are all samples for which sequence data was obtained; no sequences were obtained from the missing samples. R, resolved site; P, pustule site; Pre, preinfection; End, endpoint; TOC, test of cure.
